# Supplementary material for: Ni(salphen)-based metal–organic framework for the synthesis of cyclic carbonates by cycloaddition of CO2 to epoxides
Source: Royal Society of Chemistry journal article supplement (doi:10.1039/c2ra22550f), 2012-12-07
Supplement: c2ra22550f.pdf [file c2ra22550f.pdf]

Electronic Supplementary Information (ESI) for:

**Ni(salphen)-based metal-organic framework for the synthesis of cyclic carbonates by cycloaddition of CO<sub>2</sub> to epoxides**

Yanwei Ren, Yanchao Shi, Junxian Chen, Shaorong Yang, Chaorong Qi and Huanfeng Jiang\*

School of Chemistry and Chemical Engineering, South China University of Technology, Guangzhou, 510640, China.

E-mail: jianghf@scut.edu.cn

|                                                                                        |   |
|----------------------------------------------------------------------------------------|---|
| 1. Materials and Methods.....                                                          | 2 |
| 2. Synthesis of ligand Ni-H <sub>2</sub> L.....                                        | 3 |
| 3. Synthesis of MOF 1.....                                                             | 3 |
| 4. General Procedure for Coupling Reaction of CO <sub>2</sub> with Epoxide.....        | 3 |
| 5. Table S1. Crystal data and structure refinements for 1.....                         | 4 |
| 6. Table S2. Selected bond lengths [Å] and angles [°] for compound 1.....              | 5 |
| 7. Fig. S1. Powder X-ray diffraction patterns of 1.....                                | 6 |
| 8. Fig. S2. Coordination modes of NiL units.....                                       | 6 |
| 9. Fig. S3. 2D network of along <i>a</i> -axis.....                                    | 7 |
| 10. Fig. S4. Thermogravimetric analysis (TGA) curve for 1.....                         | 7 |
| 11. Fig. S5. Nitrogen sorption isotherm of MOF 1 at 77K.....                           | 8 |
| 12. Fig. S6. Carbon dioxide adsorption isotherms at 273 K for the activated MOF 1..... | 8 |
| 13. Fig. S7. IR spectrum of ligand Ni-H <sub>2</sub> L.....                            | 9 |
| 14. Fig. S8. IR spectrum of ligand MOF 1.....                                          | 9 |
| 15. References.....                                                                    | 9 |

## 1. Materials and general procedures

All solvents were purchased from Alfa or TCI and used without further purification. Powder X-ray diffraction (PXRD) patterns were collected on a Bruker D8 powder diffractometer at 40 kV, 40 mA with Cu K $\alpha$  radiation ( $\lambda = 1.5406 \text{ \AA}$ ), with a scan speed of 17.7 s/step and a step size of  $0.02^\circ$  ( $2\theta$ ). Thermogravimetric analyses (TGA) were performed on a Q600 SDT instrument under a flow of N<sub>2</sub> at a heating rate of  $10 \text{ }^\circ\text{C min}^{-1}$  between ambient temperature and  $800^\circ\text{C}$ . Nitrogen and carbon dioxide adsorption experiments were performed with Quantachrome AS-1 MP. Liquid nitrogen was used as coolants to achieve cryogenic temperatures (77 K). The experiments were conducted using ultrahigh-purity N<sub>2</sub> (99.999%), and CO<sub>2</sub> (99.998%). The N<sub>2</sub> sorption isotherms were collected using a pressure range from  $10^{-6}$  atm to 1 atm at 77 K. The CO<sub>2</sub> sorption isotherm was performed at 273 K, using a pressure range of 0.1–1 atm. Elemental analyses for C, H, and N were carried out using a Vario EL III Elemental Analyzer. <sup>1</sup>H NMR and <sup>13</sup>C NMR were done on a Bruker Model AM-400 (400 MHz) spectrometer. Infrared (IR) spectra were measured from a KBr pellets on a Nicolet Model Nexus 470 FT-IR spectrometer in the range of  $4000\text{--}400 \text{ cm}^{-1}$ . Gas chromatography-mass spectroscopy (GC-MS) spectrometry was recorded on Shimadzu Model GCMSQP5050A system that was equipped with a  $0.25 \text{ mm} \times 30 \text{ m}$  DB-WAX capillary column.

Single crystal X-ray diffraction data for MOF **1** were collected on a Rigaku Mercury CCD diffractometer operated at 90 kV and 50 mA using MoK $\alpha$  radiation ( $\lambda = 0.71073 \text{ \AA}$ ) at room temperature. The empirical absorption corrections were performed using the CrystalClear program.<sup>1</sup> The structure was solved by direct methods and refined on  $F^2$  by full-matrix least squares technique using the SHELXTL-97 program package.<sup>2</sup> SQUEEZE subroutine of the PLATON software suite<sup>3</sup> was applied to remove the scattering from the highly disordered guest molecules. The resulting new HKL file was used to further refine the structure. All non-hydrogen atoms were refined with anisotropic displacement parameters. Hydrogen atoms attached to carbon were placed in geometrically idealized positions and refined using a riding model. The coordinated water H atoms were not added using a riding model since the four water oxygen atoms in this structure have anomalously large  $U_{eq}$  and  $U_{ii}$  values. Note that the contributions of these eight water H atoms have been included in the overall formula, formula weight, density,  $F(000)$  calculations reported in Table S1 and in the CIF. Crystal data and details of the data collection are given in Table S1, while the selected bond distances and angles are presented in Table S2.

## 2. Synthesis of ligand Ni-H<sub>2</sub>L and MOF 1

### 2.1 Synthesis of H<sub>4</sub>L

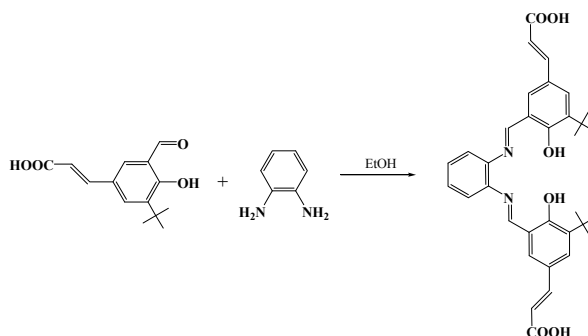

(E)-3-(3-tert-butyl-5-formyl-4-hydroxyphenyl)acrylic acid (H<sub>2</sub>tbfha) was synthesized according to the published procedure.<sup>4</sup> A solution of H<sub>2</sub>tbfha (0.981 g, 4 mmol) in EtOH (50 mL) was added dropwise to a solution of *o*-phenylenediamine (0.216 g, 2 mmol) in EtOH (50 mL) at 60°C and then the reaction mixture was stirred at 60°C for 2 h. The orange powder precipitate of H<sub>4</sub>L was collected by filtration, washed with EtOH and THF, and dried under reduced pressure (0.95 g, 85%). <sup>1</sup>H NMR (DMSO-*d*<sub>6</sub>): δ 1.33 (s, 18H), 6.28 (d, 2H), 7.39-7.51(m, 10H), 8.34(s, 2H); <sup>13</sup>C NMR(DMSO): 29.63, 35.21, 116.55, 118.64, 123.20, 125.77, 128.55, 129.15, 131.97, 133.84, 141.62, 145.73, 164.99, 166.83, 171.20

### 2.2 Synthesis of Ni-H<sub>2</sub>L

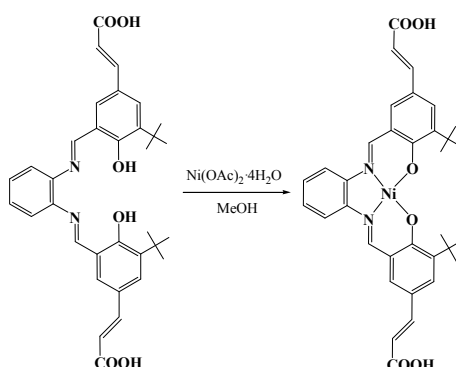

A solution of Ni(OAc)<sub>2</sub>·4H<sub>2</sub>O (0.25 g, 1 mmol) in DMF (20 mL) was added dropwise to a solution of H<sub>4</sub>L (0.56 g, 1 mmol) in DMF (20 mL). The reaction mixture was stirred at room temperature for 3h. Addition of EtOH to above red solution resulted in precipitation of a red powder of Ni-H<sub>2</sub>L, which was collected by filtration, washed with EtOH and dried under reduced pressure (0.47g, 76%). Anal (%). Calcd for C<sub>34</sub>H<sub>34</sub>N<sub>2</sub>NiO<sub>6</sub>: C, 65.30; H, 5.48; N, 4.48. Found: C, 64.75; H, 5.40; N, 4.52. IR (KBr Pellet, *v*/cm<sup>-1</sup>): 3481, 2949, 2866, 26655, 2576, 1674, 1592, 1534, 1436, 1387, 1338, 1271, 1203, 1163, 1037, 978, 949, 854, 786, 728, 621, 568, 475.

### 2.3 Synthesis of MOF 1

A solution of CdCl<sub>2</sub> (1.9 mg, 0.01 mmol), Ni-H<sub>2</sub>L (6.3 mg, 0.01 mmol), DMF (3 mL), and H<sub>2</sub>O (1 mL) in a capped vial was heated at 80°C for four days. Red block-like crystals of **1** were filtered, washed with EtOH and Et<sub>2</sub>O and dried at room temperature. The products can be best formulated as [Cd<sub>2</sub>(L-Ni)<sub>2</sub>(H<sub>2</sub>O)<sub>4</sub>]·3DMF on the basis of microanalysis, TGA and single-crystal diffraction. Anal (%). Calcd for C<sub>77</sub>H<sub>93</sub>Cd<sub>2</sub>N<sub>7</sub>Ni<sub>2</sub>O<sub>19</sub>: C, 52.46; H, 5.32; N, 5.56. Found: C, 53.06; H, 5.51; N,

5.24. IR (KBr Pellet,  $\nu/\text{cm}^{-1}$ ): 3439, 2945, 1665, 1609, 1532, 1383, 1334, 1245, 1205, 1163, 1098, 977, 862, 784, 751, 664, 625, 567.

#### 2.4 General Procedure for Coupling Reaction of CO<sub>2</sub> with Epoxide

A 10-mL stainless steel reactor was charged with epoxide (10.0 mmol), catalyst and ammonium salt (amount indicated in the text), and then CO<sub>2</sub> (2 MPa). The mixture was heated with stirring at a constant temperature for a reaction time. The reactor was then cooled in an ice bath for 30 min, and excess CO<sub>2</sub> was released carefully. The catalyst was recovered by centrifugation and the filtrate was analyzed by a GC-MS spectrometer (using 1,3,5-trimethylbenzene as an internal standard).

**Table S1.** Crystal data and structure refinements for **1**

| Compound                                            | <b>1</b>                                                                                       |
|-----------------------------------------------------|------------------------------------------------------------------------------------------------|
| Empirical formula                                   | C <sub>77</sub> H <sub>93</sub> Cd <sub>2</sub> N <sub>7</sub> Ni <sub>2</sub> O <sub>19</sub> |
| Formula weight                                      | 1762.81                                                                                        |
| Temperature (K)                                     | 293                                                                                            |
| Wavelength (Å)                                      | 0.71073                                                                                        |
| Crystal system                                      | triclinic                                                                                      |
| Space group                                         | <i>P</i> -1                                                                                    |
|                                                     | $a = 16.348(3) \text{ \AA}$ $\alpha = 89.29(3)^\circ$                                          |
|                                                     | $b = 16.635(3) \text{ \AA}$ $\beta = 87.12(3)^\circ$                                           |
|                                                     | $c = 20.293(4) \text{ \AA}$ $\gamma = 68.48(3)^\circ$                                          |
| Volume (Å <sup>3</sup> )                            | 5127.4(17)                                                                                     |
| <i>Z</i>                                            | 2                                                                                              |
| Density (calcd. g/cm <sup>3</sup> )                 | 1.142                                                                                          |
| Absorption coeff. (mm <sup>-1</sup> )               | 0.816                                                                                          |
| F(000)                                              | 1816                                                                                           |
| Crystal size (mm)                                   | 0.20 × 0.20 × 0.20                                                                             |
| Crystal color & shape                               | brown block                                                                                    |
| $\theta$ range data collection                      | 3.02 to 25.00                                                                                  |
| Limiting indices                                    | -18 ≤ <i>h</i> ≤ 19, -19 ≤ <i>k</i> ≤ 19,<br>-24 ≤ <i>l</i> ≤ 24                               |
| Reflections collected                               | 38898                                                                                          |
| unique                                              | 17511 [ <i>R</i> <sub>(int)</sub> = 0.0534]                                                    |
| Refinement method                                   | Full-matrix least-squares on <i>F</i> <sup>2</sup>                                             |
| Data/restraints/parameters                          | 17511 / 115 / 830                                                                              |
| Goodness-of-fit on <i>F</i> <sup>2</sup>            | 0.947                                                                                          |
| Final <i>R</i> indices [ <i>I</i> > 2σ( <i>I</i> )] | <i>R</i> <sub>1</sub> = 0.0810, <i>wR</i> <sub>2</sub> = 0.2369                                |
| <i>R</i> indices (all data)                         | <i>R</i> <sub>1</sub> = 0.1333, <i>wR</i> <sub>2</sub> = 0.2650                                |

**Table S2.** Selected bond lengths [Å] and angles [°] for **1<sup>a</sup>**

| Bond lengths        |           |                       |           |
|---------------------|-----------|-----------------------|-----------|
| Cd(1)-O(10)         | 2.281(7)  | Cd(2)-O(12)#2         | 2.355(6)  |
| Cd(1)-O(2W)         | 2.248(12) | Cd(2)-O(5)            | 2.364(6)  |
| Cd(1)-O(10)         | 2.281(6)  | Cd(2)-O(11)#3         | 2.582(11) |
| Cd(1)-O(3)          | 2.292(6)  | Cd(2)-O(12)#2         | 2.355(7)  |
| Cd(1)-O(4)          | 2.349(5)  | Ni(1)-O(2)            | 1.837(4)  |
| Cd(1)-O(1W)         | 2.403(16) | Ni(1)-N(1)            | 1.843(5)  |
| Cd(1)-O(9)          | 2.546(7)  | Ni(1)-N(2)            | 1.842(4)  |
| Cd(2)-O(4W)         | 2.181(8)  | Ni(1)-O(1)            | 1.853(4)  |
| Cd(2)-O(11)#2       | 2.286(8)  | Ni(2)-O(7)            | 1.831(4)  |
| Cd(2)-O(6)          | 2.316(9)  | Ni(2)-O(8)            | 1.839(5)  |
| Cd(2)-O(3W)         | 2.360(13) | Ni(2)-N(4)            | 1.850(5)  |
| Cd(1)-O(10)#1       | 2.234(10) | Ni(2)-N(3)            | 1.868(6)  |
| Bond angles         |           |                       |           |
| O(2W)-Cd(1)-O(10)#1 | 91.3(5)   | O(11)#2-Cd(2)-O(3W)   | 123.9(5)  |
| O(2W)-Cd(1)-O(10)   | 92.8(4)   | O(6)-Cd(2)-O(3W)      | 96.7(4)   |
| O(10)#1-Cd(1)-O(10) | 69.6(4)   | O(4W)-Cd(2)-O(12)#2   | 90.3(3)   |
| O(2W)-Cd(1)-O(3)    | 93.2(4)   | O(11)#2-Cd(2)-O(12)#2 | 51.7(3)   |
| O(10)#1-Cd(1)-O(3)  | 147.7(2)  | O(6)-Cd(2)-O(12)#2    | 129.7(3)  |
| O(10)-Cd(1)-O(3)    | 142.0(3)  | O(3W)-Cd(2)-O(12)#2   | 84.9(4)   |
| O(2W)-Cd(1)-O(4)    | 95.2(3)   | O(4W)-Cd(2)-O(5)      | 89.0(3)   |
| O(10)#1-Cd(1)-O(4)  | 91.4(3)   | O(11)#2-Cd(2)-O(5)    | 137.3(3)  |
| O(10)-Cd(1)-O(4)    | 159.6(3)  | O(6)-Cd(2)-O(5)       | 52.1(3)   |
| O(3)-Cd(1)-O(4)     | 56.3(2)   | O(3W)-Cd(2)-O(5)      | 82.8(4)   |
| O(2W)-Cd(1)-O(10)#1 | 91.3(5)   | O(12)#2-Cd(2)-O(5)    | 167.6(3)  |
| O(2W)-Cd(1)-O(1W)   | 174.9(4)  | O(4W)-Cd(2)-O(11)#3   | 81.9(4)   |
| O(10)#1-Cd(1)-O(1W) | 89.8(5)   | O(11)#2-Cd(2)-O(11)#3 | 68.7(5)   |
| O(10)-Cd(1)-O(1W)   | 83.0(4)   | O(6)-Cd(2)-O(11)#3    | 89.6(3)   |
| O(3)-Cd(1)-O(1W)    | 88.5(4)   | O(3W)-Cd(2)-O(11)#3   | 165.8(6)  |
| O(4)-Cd(1)-O(1W)    | 89.7(4)   | O(12)#2-Cd(2)-O(11)#3 | 101.0(3)  |
| O(2W)-Cd(1)-O(9)    | 85.2(3)   | O(5)-Cd(2)-O(11)#3    | 91.2(3)   |
| O(10)#1-Cd(1)-O(9)  | 120.9(3)  | O(4W)-Cd(2)-C(66)#2   | 109.1(4)  |
| O(10)-Cd(1)-O(9)    | 51.8(3)   | O(11)#2-Cd(2)-C(66)#2 | 25.5(3)   |
| O(3)-Cd(1)-O(9)     | 91.3(2)   | O(6)-Cd(2)-C(66)#2    | 109.0(4)  |
| O(4)-Cd(1)-O(9)     | 147.7(3)  | O(3W)-Cd(2)-C(66)#2   | 104.4(5)  |
| O(1W)-Cd(1)-O(9)    | 90.0(5)   | O(12)#2-Cd(2)-C(66)#2 | 26.3(3)   |
| O(2W)-Cd(1)-C(26)   | 96.4(3)   | O(5)-Cd(2)-C(66)#2    | 160.9(4)  |
| O(10)#1-Cd(1)-C(26) | 119.0(3)  | O(11)#3-Cd(2)-C(66)#2 | 85.5(3)   |
| O(10)-Cd(1)-C(26)   | 167.2(4)  | O(4W)-Cd(2)-C(33)     | 115.2(4)  |
| O(3)-Cd(1)-C(26)    | 28.7(2)   | O(11)#2-Cd(2)-C(33)   | 112.9(4)  |
| O(4)-Cd(1)-C(26)    | 27.7(2)   | O(6)-Cd(2)-C(33)      | 25.3(3)   |
| O(1W)-Cd(1)-C(26)   | 87.3(4)   | O(3W)-Cd(2)-C(33)     | 90.2(3)   |
| O(9)-Cd(1)-C(26)    | 120.0(3)  | O(12)#2-Cd(2)-C(33)   | 153.5(4)  |

|                     |           |                     |          |
|---------------------|-----------|---------------------|----------|
| O(4W)-Cd(2)-O(11)#2 | 122.7(4)  | O(5)-Cd(2)-C(33)    | 26.7(3)  |
| O(4W)-Cd(2)-O(6)    | 140.0(3)  | O(11)#3-Cd(2)-C(33) | 90.0(3)  |
| O(11)#2-Cd(2)-O(6)  | 89.2(3)   | C(66)#2-Cd(2)-C(33) | 134.3(4) |
| O(4W)-Cd(2)-O(3W)   | 85.2(6)   | O(2)-Ni(1)-N(2)     | 94.5(2)  |
| O(2)-Ni(1)-N(1)     | 179.4(2)  | O(7)-Ni(2)-N(4)     | 175.9(2) |
| N(2)-Ni(1)-N(1)     | 84.9(2)   | O(8)-Ni(2)-N(4)     | 95.5(2)  |
| O(2)-Ni(1)-O(1)     | 86.28(18) | O(7)-Ni(2)-N(3)     | 94.1(2)  |
| N(2)-Ni(1)-O(1)     | 178.7(2)  | O(8)-Ni(2)-N(3)     | 172.6(2) |
| N(1)-Ni(1)-O(1)     | 94.4(2)   | N(4)-Ni(2)-N(3)     | 85.7(3)  |
| O(7)-Ni(2)-O(8)     | 85.2(2)   |                     |          |

<sup>a</sup> Symmetry mode for **1**: #1 -x+1, -y+2, -z; #2 x+1, y, z+2; #3 -x+2, -y+1, -z; #4 x-1, y, z-2.

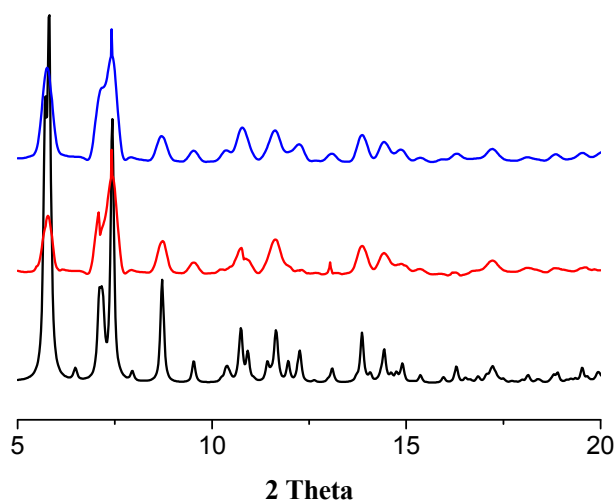

**Fig. S1** Powder X-ray diffraction patterns of **1**, black: simulated patterns from single-crystal structure; red: as-synthesized pristine sample; blue: after 3 run catalysis.

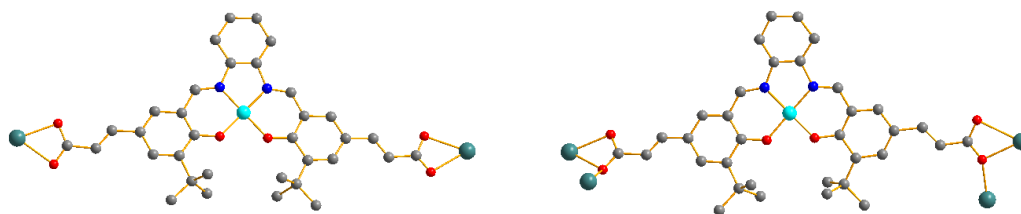

**Fig. S2** Coordination modes of NiL units.

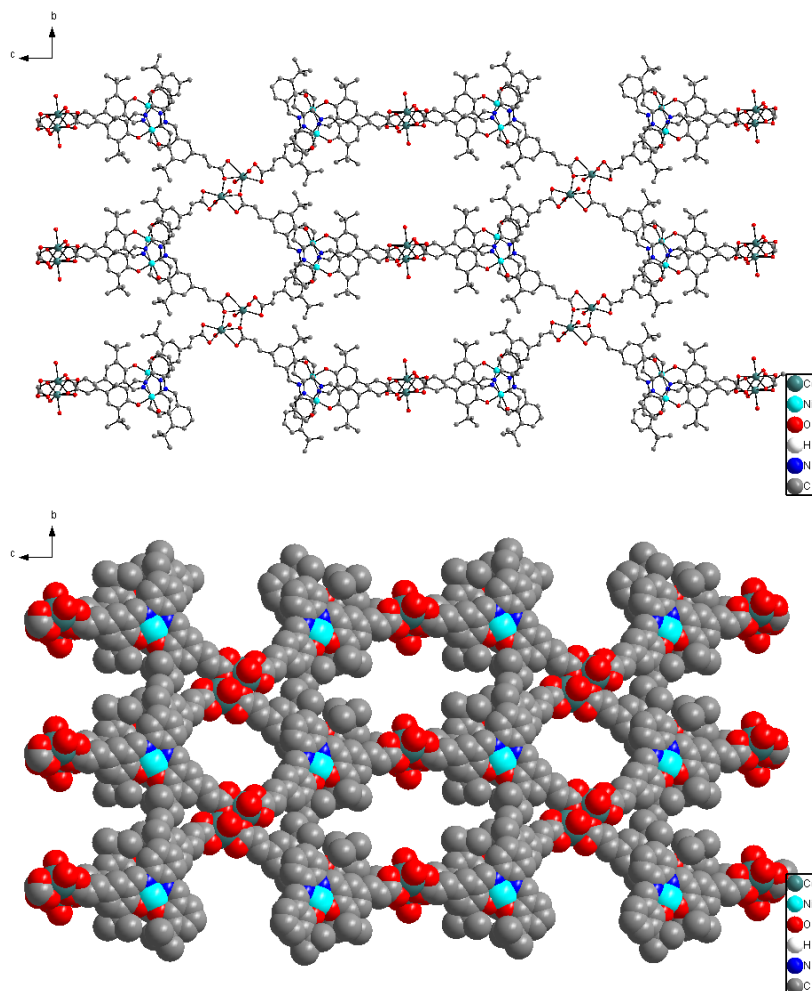

**Fig. S3** 2D network of along *a*-axis.

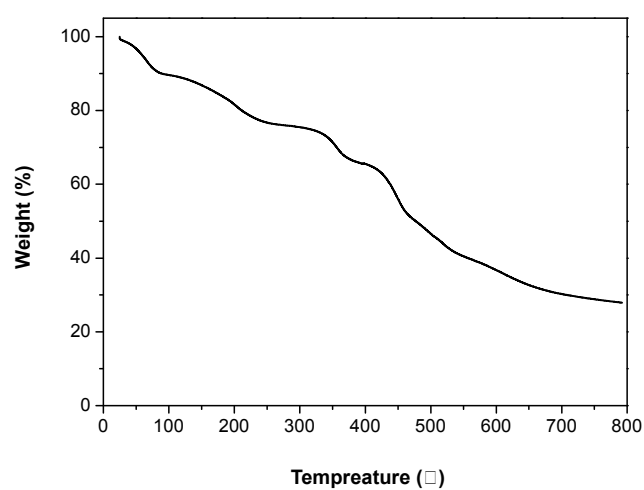

**Fig. S4** Thermogravimetric analysis (TGA) curve for **1**. The sample was heated to 800 °C at the heating rate of 10 °C /min.

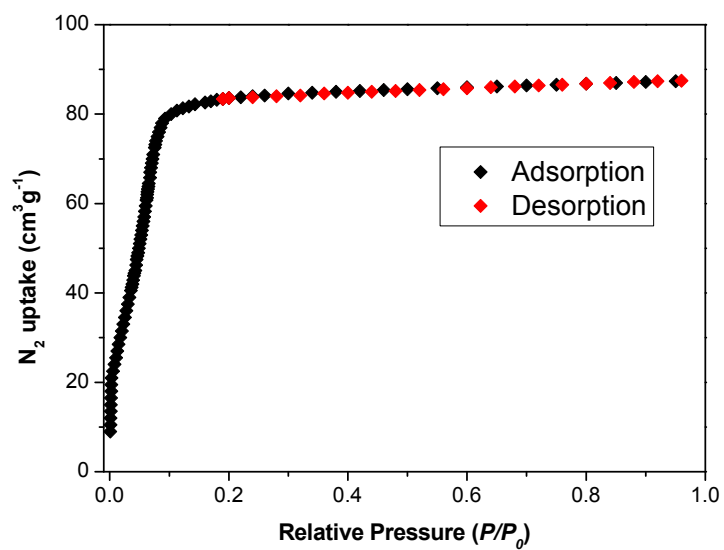

Fig. S5 Nitrogen adsorption isotherm of MOF 1 at 77K.

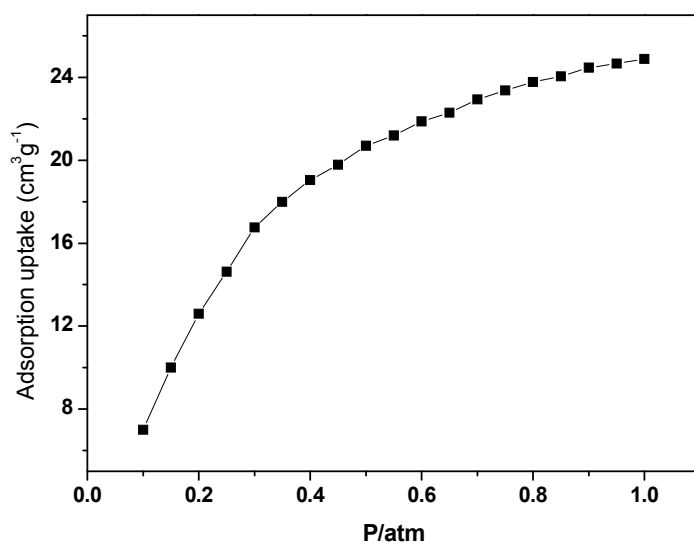

Fig. S6 Carbon dioxide adsorption isotherm for MOF 1 at 273 K.



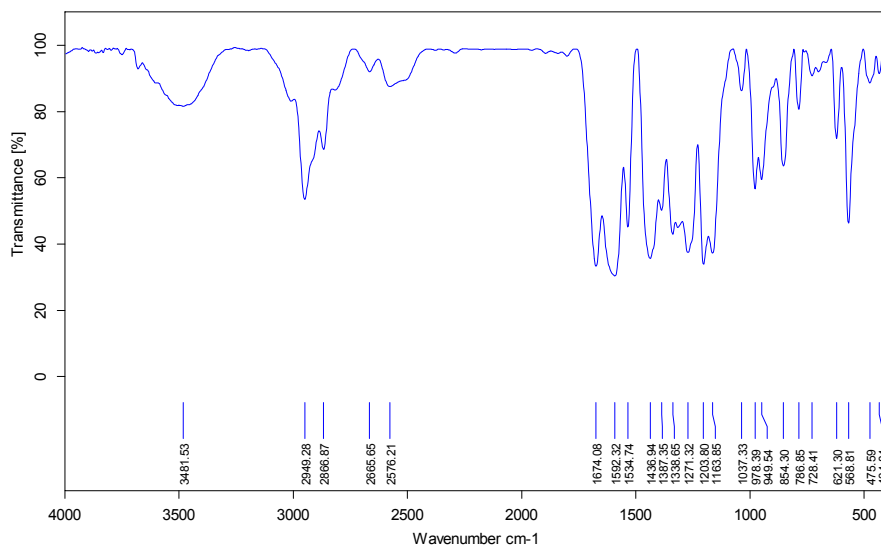

**Fig. S7** IR spectrum of ligand Ni-H<sub>2</sub>L

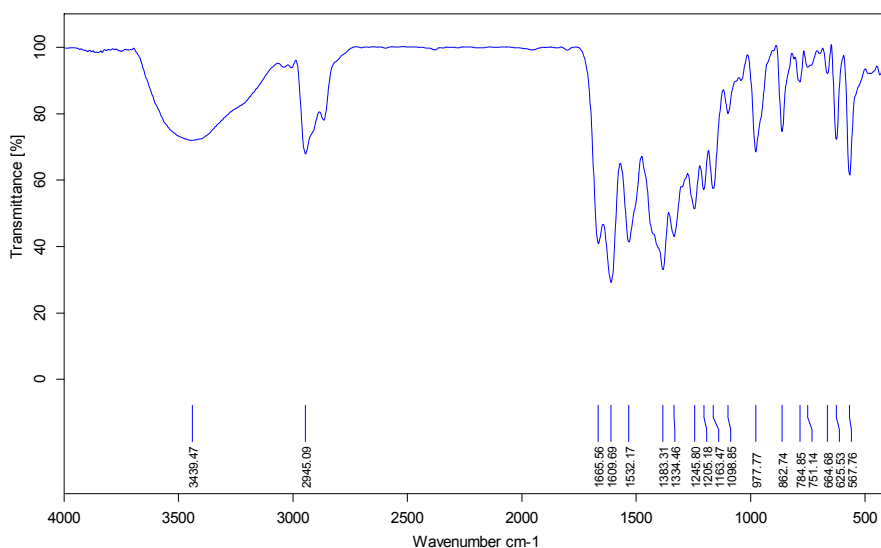

**Fig. S8** IR spectrum of ligand MOF 1

## References

1. (a) Molecular Structure Corporation. CrystalClear, Version 1.36; Molecular Structure Corporation (MSC), The Woodlands, TX, USA, 2000. (b) Rigaku Corporation. CrystalClear, Version 1.36; Rigaku Corporation, Tokyo, Japan, 2000.
2. G. M. Sheldrick, *Acta Cryst.*, 2008, A64, 112-122.
3. A. L. Spek, (2008) PLATON, A Multipurpose Crystallographic Tool, Utrecht University, Utrecht, The Netherlands.
4. F. Song, C. Wang, J. M. Falkowski, L. Ma, and W. Lin, *J. Am. Chem. Soc.*, 2010, 132, 15390-15398.
